# Supplementary material
Source: Springer Nature journal article supplement (https://www.springermedizin.de/resource/supplementary/12931_2010_1054_MOESM4_ESM.pdf/9425532)

### Allergic Balb/C

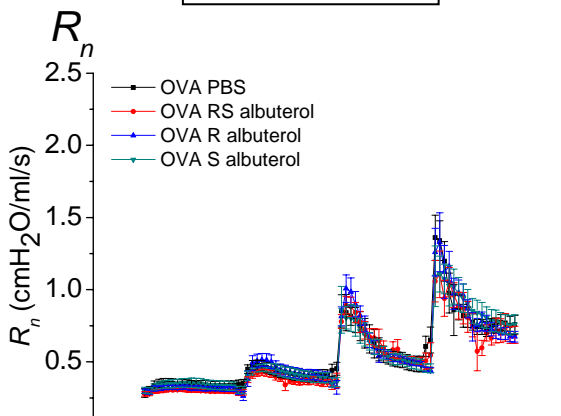

### Naïve Balb/C

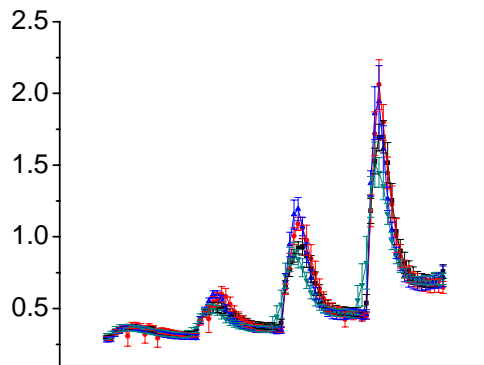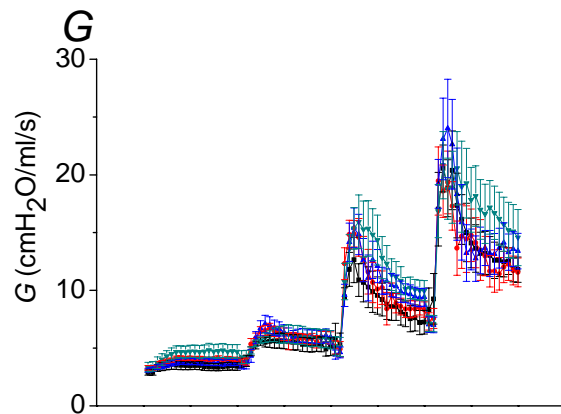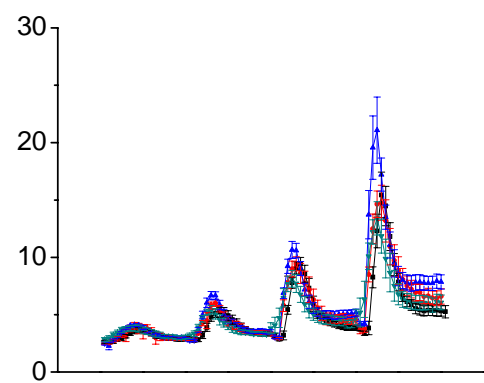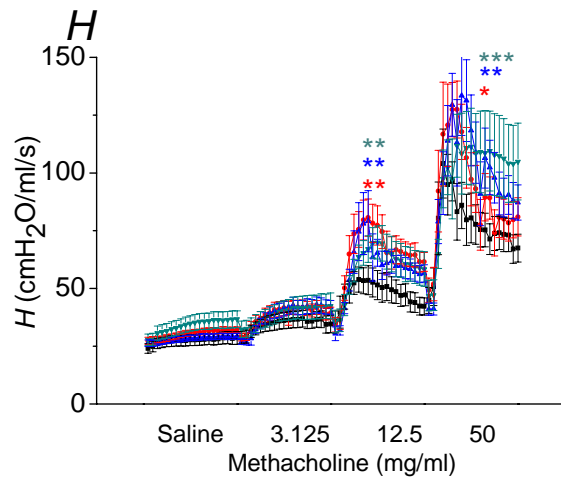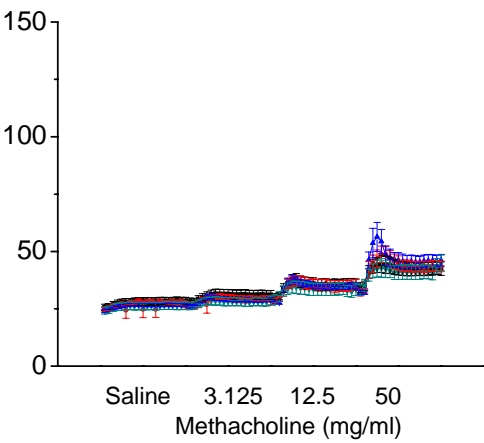

Saline 3.125 12.5 50  
Methacholine (mg/ml)

Saline 3.125 12.5 50  
Methacholine (mg/ml)

Supplement: MOESM4 [file 9425532]
